# Supplementary figures and images for: Lupus pathogenesis and autoimmunity are exacerbated by high fat diet-induced obesity in MRL/lpr mice
Source: HighWire-hosted journal article supplement (doi:10.1136/lupus-2023-000898), 2023-04-01

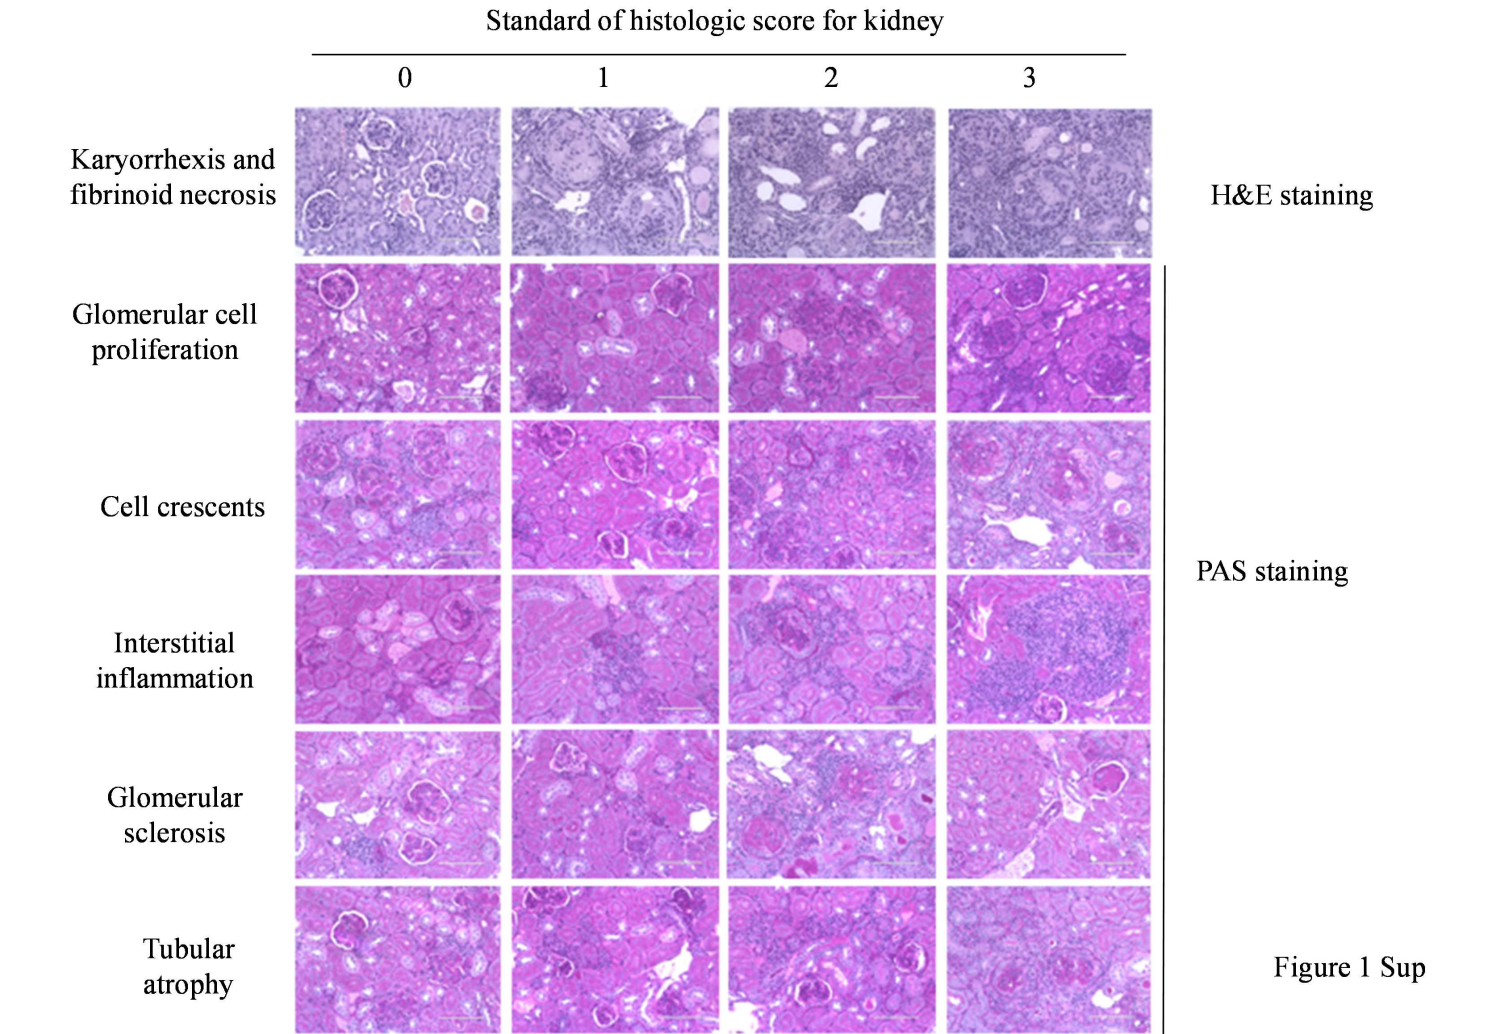

Supplement: lupus-2023-000898supp001_data_supplement.pdf [file lupus-2023-000898supp001_data_supplement.pdf]

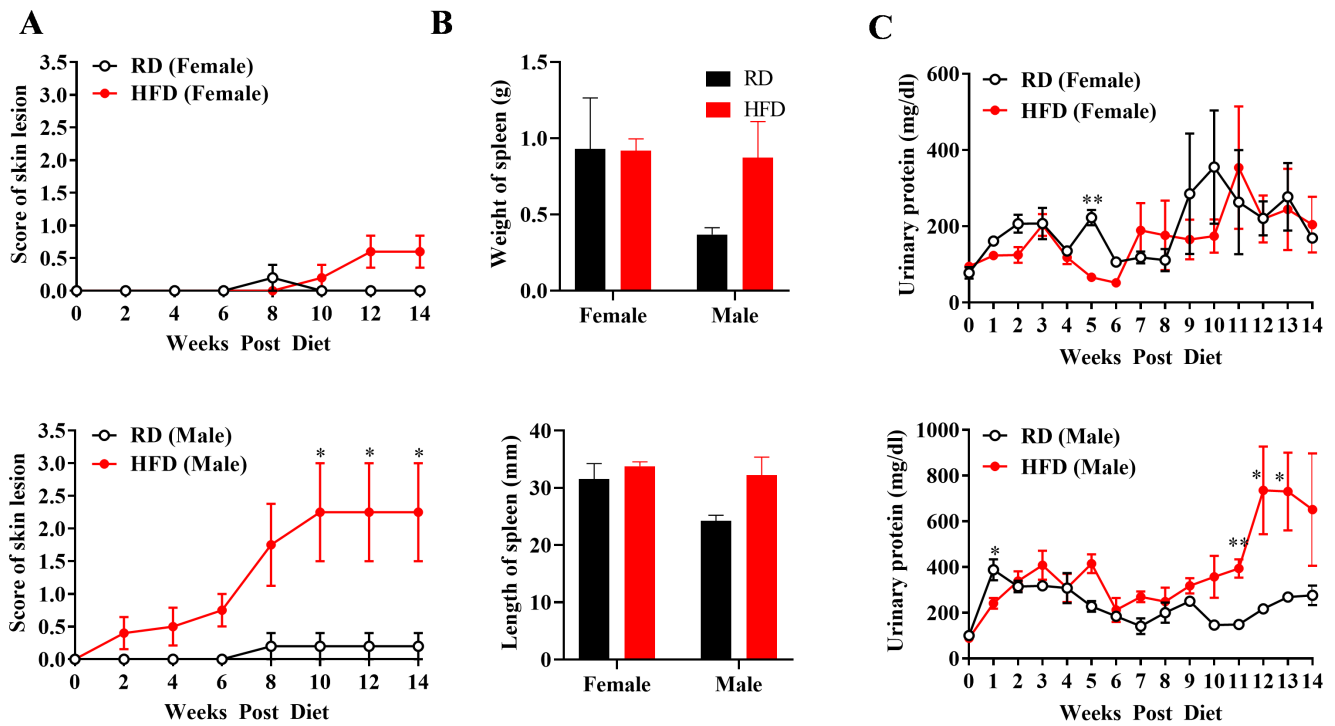

Figure 2 sup

Supplement: lupus-2023-000898supp002_data_supplement.pdf [file lupus-2023-000898supp002_data_supplement.pdf]

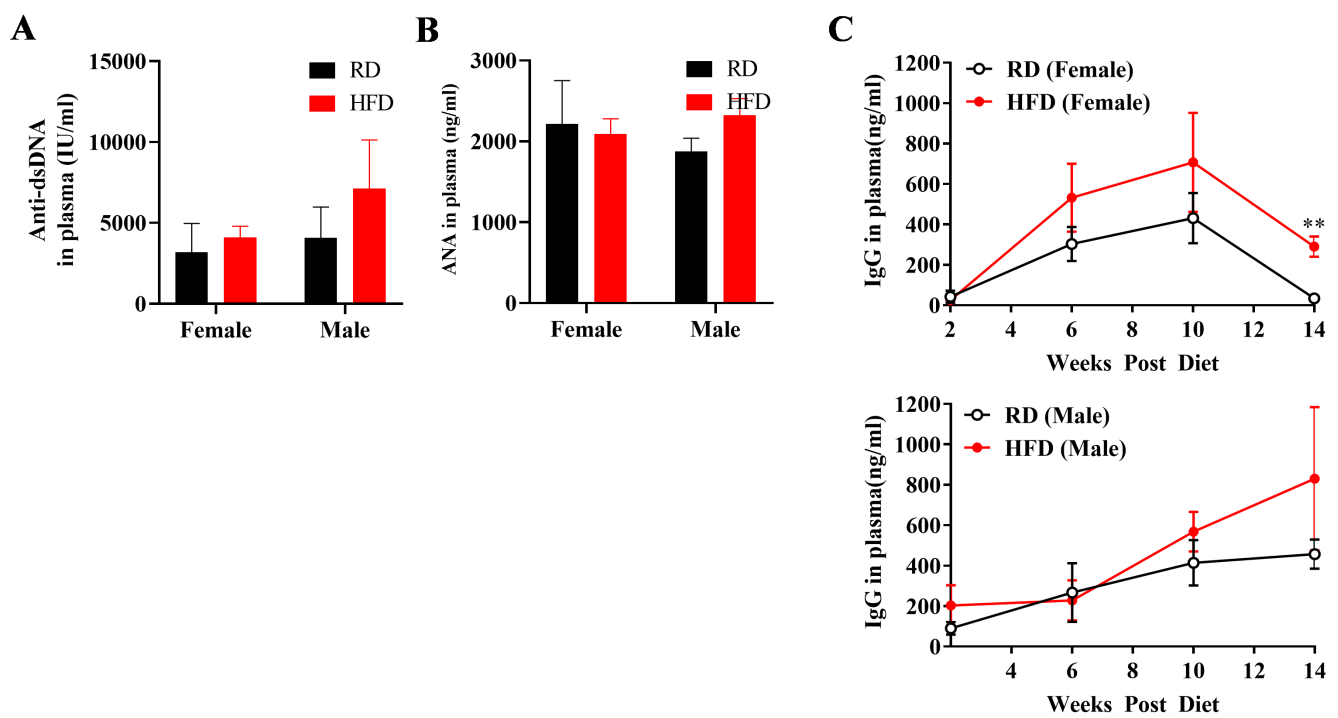

Figure 4 sup

Supplement: lupus-2023-000898supp004_data_supplement.pdf [file lupus-2023-000898supp004_data_supplement.pdf]
